# Supplementary material for: Disappearing day-of-week ozone patterns in US nonattainment areas
Source: Copernicus journal article supplement (doi:10.5194/egusphere-2023-1974), 2023-09-04
Supplement: Supplementary file 1 [file egusphere-2023-1974-supplement.pdf]

# Supplemental Information for Disappearing Day-of-Week Ozone Patterns in US Nonattainment areas

Heather Simon<sup>1</sup>, Christian Hogrefe<sup>2</sup>, Andrew Whitehill<sup>2</sup>, Kristen Foley<sup>2</sup>, Jennifer Liljegren<sup>3</sup>,  
Norm Possiel<sup>1</sup>, Benjamin Wells<sup>1</sup>, Barron Henderson<sup>1</sup>, Luke Valin<sup>2</sup>, Gail Tonnesen<sup>4</sup>, Wyatt  
Appel<sup>2</sup>, Shannon Koplitz<sup>1</sup>

<sup>1</sup>US Environmental Protection Agency, Office of Air and Radiation, Research Triangle Park, NC

<sup>2</sup>US Environmental Protection Agency, Office of Research and Development, Research Triangle Park, NC

<sup>3</sup>US Environmental Protection Agency, Region 5, Chicago, IL

<sup>4</sup>US Environmental Protection Agency, Region 8, Denver, CO

## Contents

|                                                                                                                                                                                               |    |
|-----------------------------------------------------------------------------------------------------------------------------------------------------------------------------------------------|----|
| Extra figures showing area-specific observed and modeled ozone distributions, modeled NO <sub>x</sub> distributions, modeled formaldehyde distributions and trends in $\Delta O_3, DOW$ ..... | 2  |
| Extra figures showing absolute and relative trends in WE-WD differences for modeled NO <sub>x</sub> and formaldehyde .....                                                                    | 6  |
| Extra figures showing monitor-level trends in $\Delta O_3, DOW$ .....                                                                                                                         | 7  |
| Extra figures showing area-specific percentage of days exceeding the NAAQS on weekends and weekdays and trends in $\Delta O_3, DOW, \% > 70$ .....                                            | 8  |
| Extra figures showing relationships between WE-WD patterns in meteorology and $\Delta O_3, DOW$ .....                                                                                         | 9  |
| Extra figures showing CMAQ MDA8 O <sub>3</sub> Normalized Mean Bias by season, region, and year .....                                                                                         | 11 |
| Tables of results for each nonattainment area included in this analysis .....                                                                                                                 | 12 |

Extra figures showing area-specific observed and modeled ozone distributions, modeled NO<sub>x</sub> distributions, modeled formaldehyde distributions and trends in  $\Delta\bar{O}_{3,DOW}$

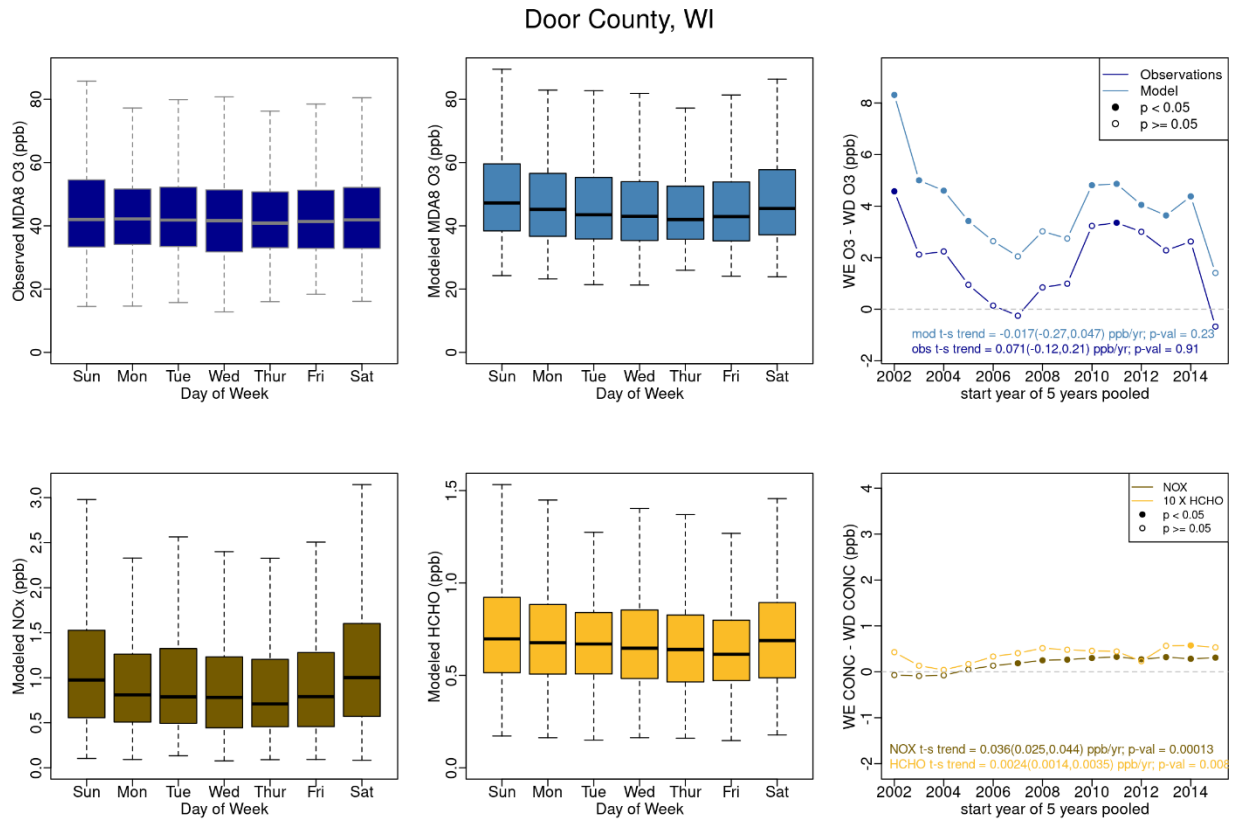

Figure S-1. Door County, WI nonattainment area 2002-2019 May-Sep: observed (top left) and modeled (top center) MDA8 ozone distribution by day of week; modeled NO<sub>x</sub> (bottom left) and modeled formaldehyde (bottom center) distribution by day of week; observed and modeled trends in  $\Delta\bar{O}_{3,DOW}$  (top right); modeled trends in WE-WD NO<sub>x</sub> and formaldehyde differences (bottom right). The distributions by day of the week are for the entire 18 years with each box representing the 25<sup>th</sup> to 75<sup>th</sup> percentile for that day of the week across all 18 years, the whiskers representing the 1.5 times the interquartile range, and the bold line inside the box representing the median. WE-WD differences (top and bottom right) are based on 5-year rolling periods.

Chicago, IL-IN-WI

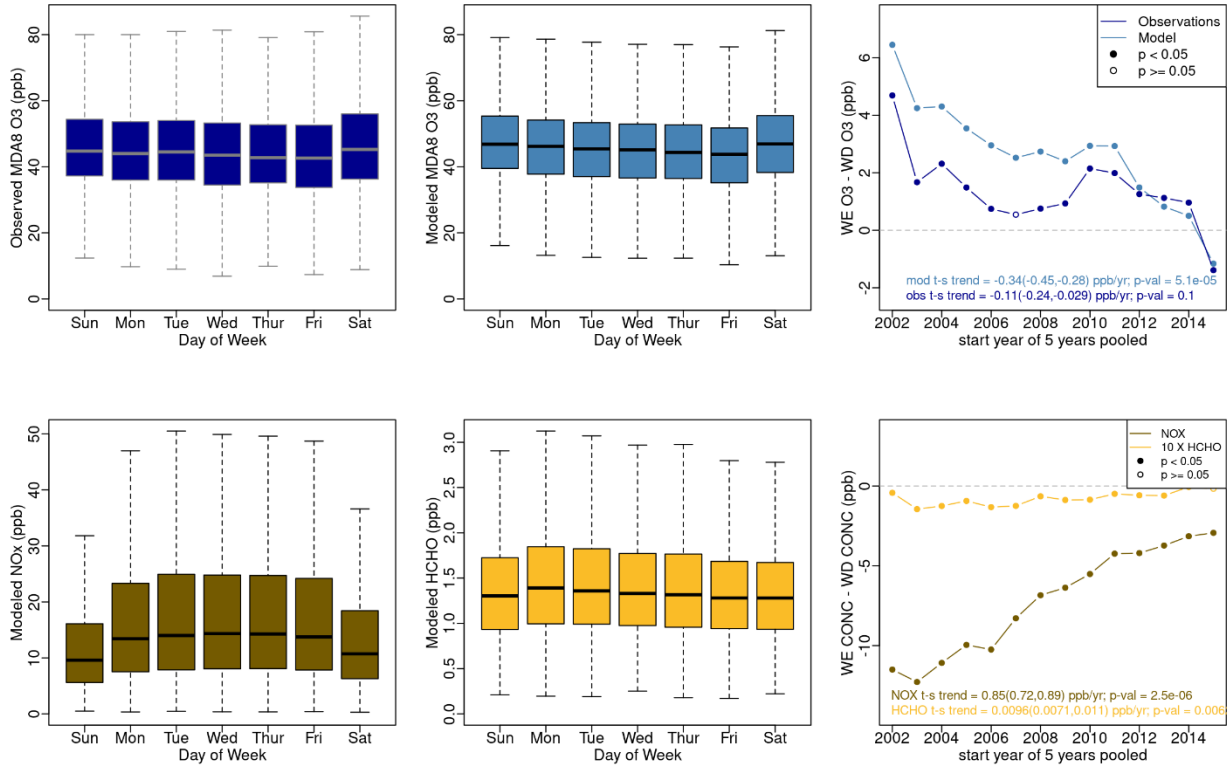

**Figure S-2. Chicago area 2002-2019 May-Sep: observed (top left) and modeled (top center) MDA8 ozone distribution by day of week; modeled NO<sub>x</sub> (bottom left) and modeled formaldehyde (bottom center) distribution by day of week; observed and modeled trends in  $\Delta\overline{O}_{3,DOW}$  (top right); modeled trends in WE-WD NO<sub>x</sub> and formaldehyde differences (bottom right). The distributions by day of the week are for the entire 18 years with each box representing the 25<sup>th</sup> to 75<sup>th</sup> percentile for that day of the week across all 18 years, the whiskers representing the 1.5 times the interquartile range, and the bold line inside the box representing the median. WE-WD differences (top and bottom right) are based on 5-year rolling periods.**

### Houston-Galveston-Brazoria, TX

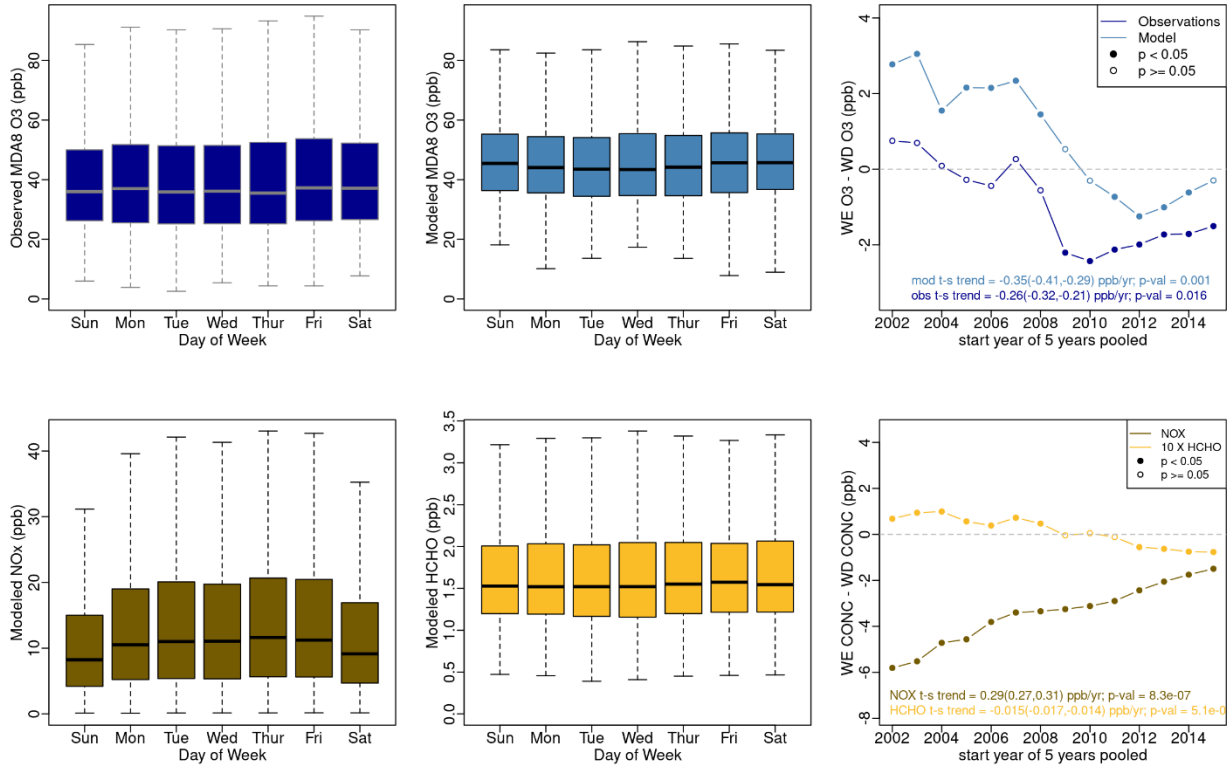

**Figure S-3. Houston area 2002-2019 May-Sep: observed (top left) and modeled (top center) MDA8 ozone distribution by day of week; modeled NO<sub>x</sub> (bottom left) and modeled formaldehyde (bottom center) distribution by day of week; observed and modeled trends in  $\Delta\overline{O}_{3,DOW}$  (top right); modeled trends in WE-WD NO<sub>x</sub> and formaldehyde differences (bottom right). The distributions by day of the week are for the entire 18 years with each box representing the 25<sup>th</sup> to 75<sup>th</sup> percentile for that day of the week across all 18 years, the whiskers representing the 1.5 times the interquartile range, and the bold line inside the box representing the median. WE-WD differences (top and bottom right) are based on 5-year rolling periods.**

New York-Northern New Jersey-Long Island, NY-NJ-CT

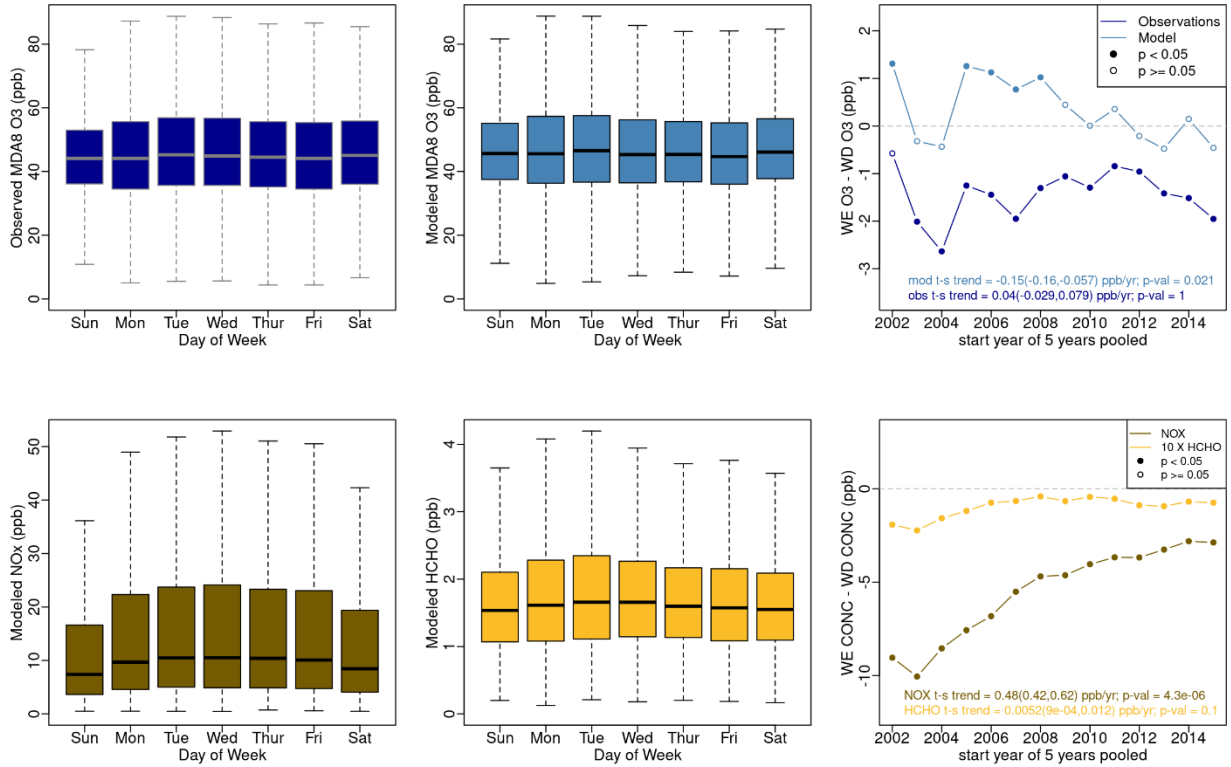

Figure S-4. New York City nonattainment area 2002-2019 May-Sep: observed (top left) and modeled (top center) MDA8 ozone distribution by day of week; modeled NO<sub>x</sub> (bottom left) and modeled formaldehyde (bottom center) distribution by day of week; observed and modeled trends in  $\Delta\overline{O}_{3,DOW}$  (top right); modeled trends in WE-WD NO<sub>x</sub> and formaldehyde differences (bottom right). The distributions by day of the week are for the entire 18 years with each box representing the 25<sup>th</sup> to 75<sup>th</sup> percentile for that day of the week across all 18 years, the whiskers representing the 1.5 times the interquartile range, and the bold line inside the box representing the median. WE-WD differences (top and bottom right) are based on 5-year rolling periods.

Extra figures showing absolute and relative trends in WE-WD differences for modeled NO<sub>x</sub> and formaldehyde

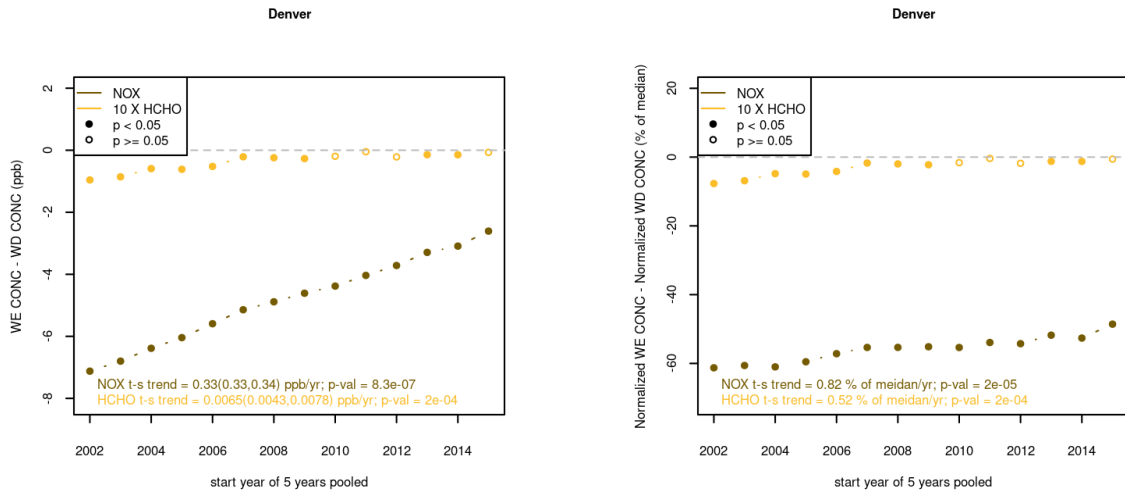

Figures S-5. Denver area May-Sep 2002-2019 modeled absolute trends in WE-WD NO<sub>x</sub> and formaldehyde differences (left) and modeled relative trends in WE-WD NO<sub>x</sub> and formaldehyde differences (right)

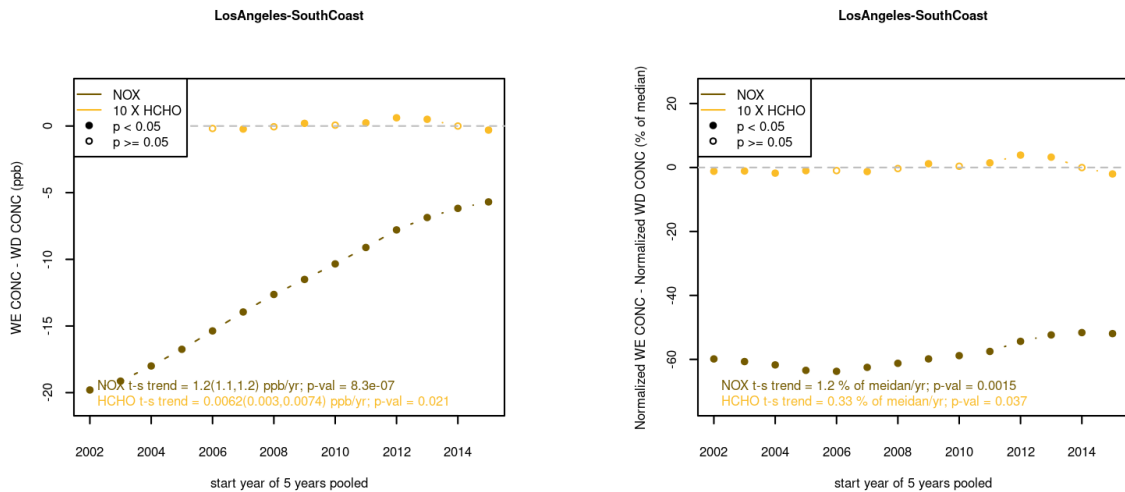

Figure S-6. Los Angeles area May-Sep 2002-2019 modeled absolute trends in WE-WD NO<sub>x</sub> and formaldehyde differences (left) and modeled relative trends in WE-WD NO<sub>x</sub> and formaldehyde differences (right)

Extra figures showing monitor-level trends in  $\Delta \overline{O_{3,DOW}}$

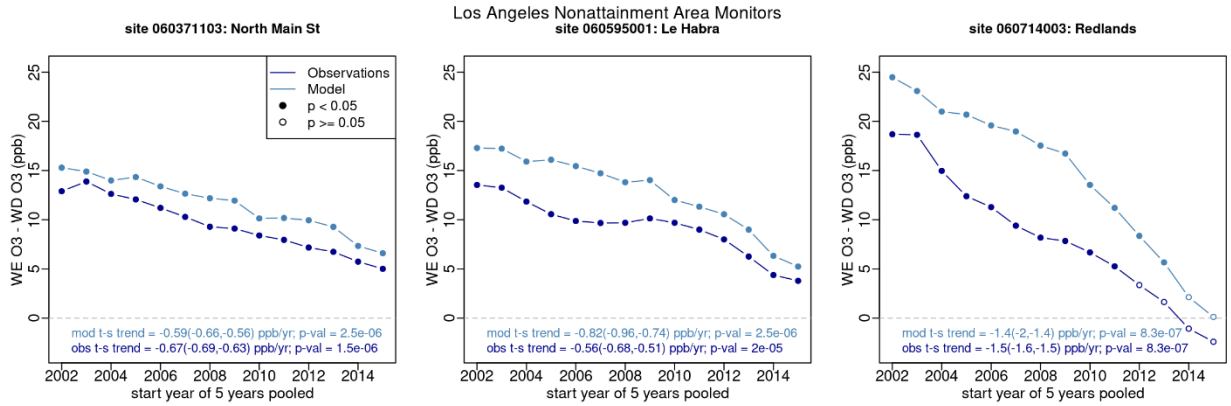

Figures S-7. Observed and modeled May-Sep trends in  $\Delta \overline{O_{3,DOW}}$  at 3 Los Angeles area monitoring locations for 2002-2019.

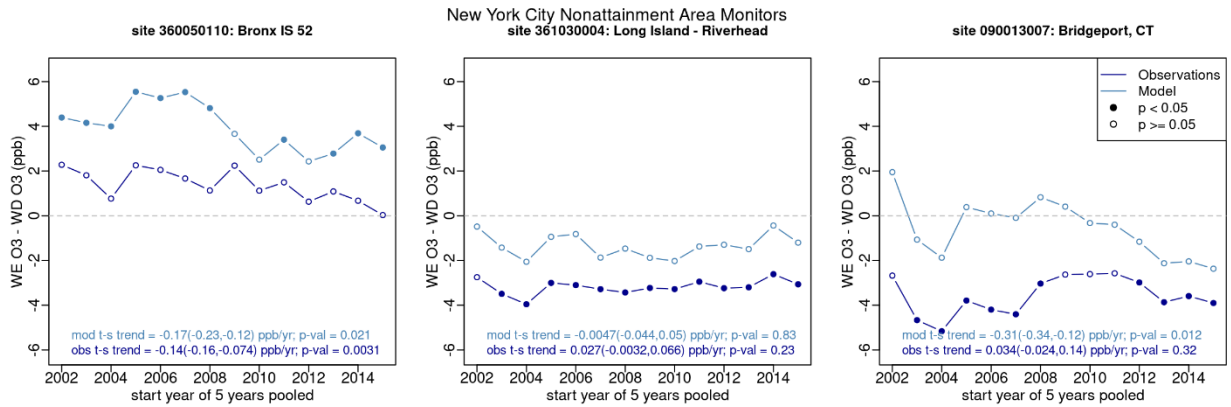

Figure S-8. Observed and modeled May-Sep trends in  $\Delta \overline{O_{3,DOW}}$  at 3 New York City area monitoring locations for 2002-2019.

Extra figures showing area-specific percentage of days exceeding the NAAQS on weekends and weekdays and trends in  $\Delta O_{3,DOW,\%>70}$

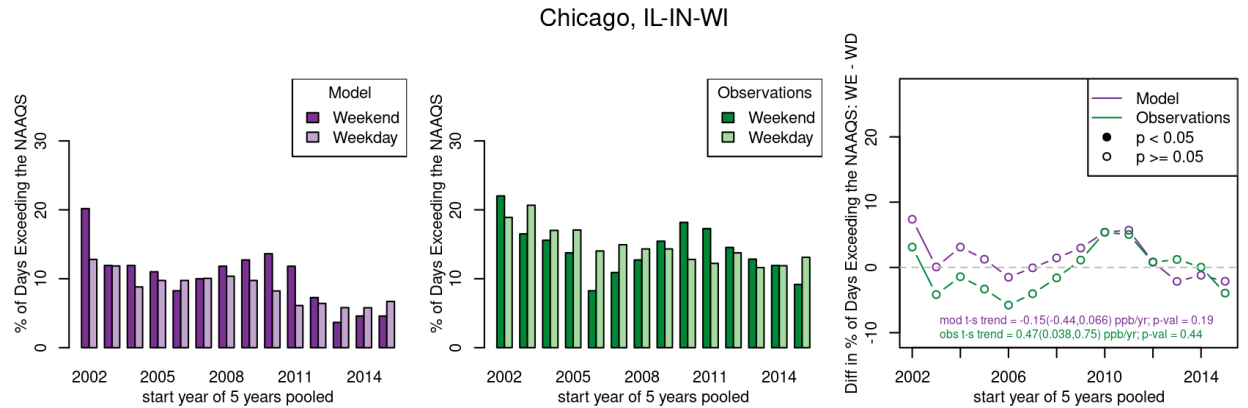

Figure S-9. Modeled (left) and observed (center) percent of days with MDA8 ozone exceeding 70 ppb at any monitor within the Chicago nonattainment area during May-Sep on weekends and weekdays for 5-year rolling periods between 2002-2019; Observed and modeled trends in May-Sep  $\Delta O_{3,DOW,\%>70}$  at Chicago area monitors for 5-year rolling periods between 2002-2019 (right).

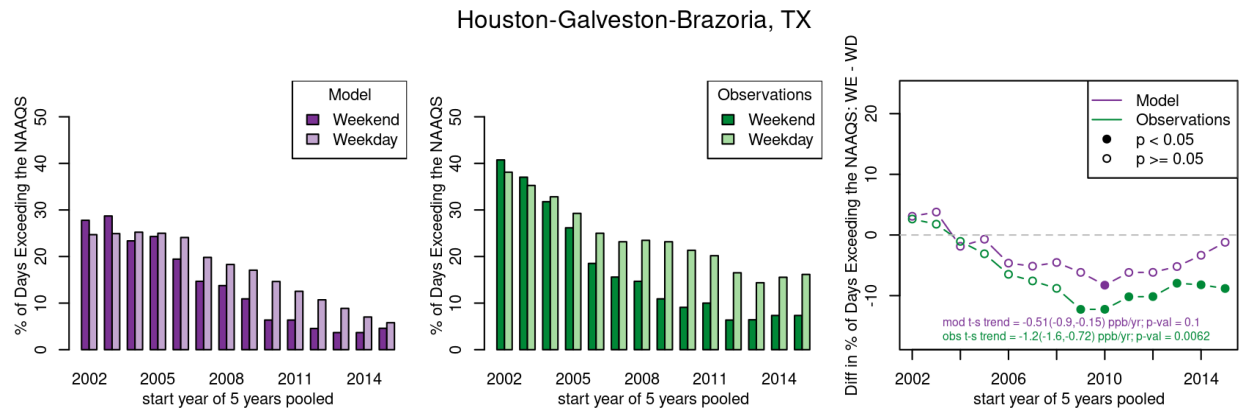

Figure S-10. Modeled (left) and observed (center) percent of days with MDA8 ozone exceeding 70 ppb at any monitor within the Houston nonattainment area during May-Sep on weekends and weekdays for 5-year rolling periods between 2002-2019; Observed and modeled trends in May-Sep  $\Delta O_{3,DOW,\%>70}$  at Houston area monitors for 5-year rolling periods between 2002-2019 (right).



New York-Northern New Jersey-Long Island, NY-NJ-CT

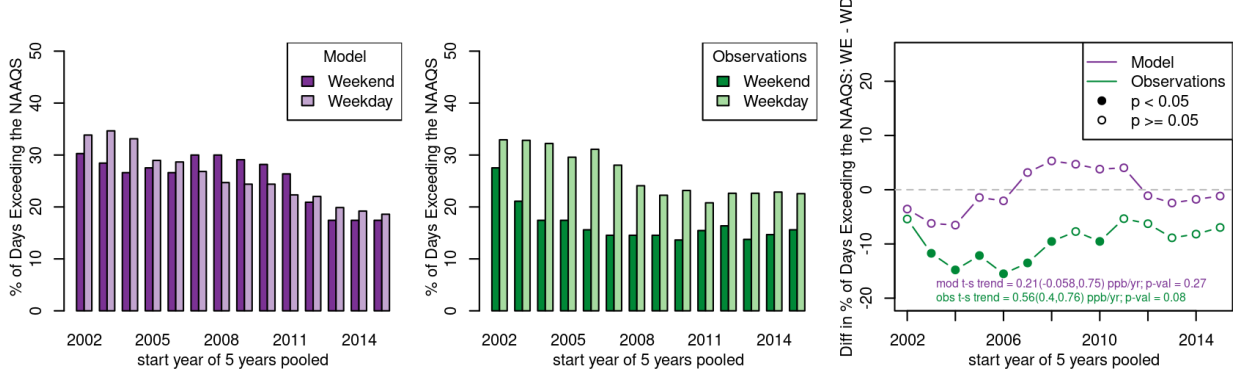

Figure S-11. Modeled (left) and observed (center) percent of days with MDA8 ozone exceeding 70 ppb at any monitor within the New York City nonattainment area during May-Sep on weekends and weekdays for 5-year rolling periods between 2002-2019; Observed and modeled trends in May-Sep  $\Delta O_{3,DOW,\%>70}$  at New York City area monitors for 5-year rolling periods between 2002-2019 (right).

Extra figures showing relationships between WE-WD patterns in meteorology and  $\Delta O_{3,DOW}$

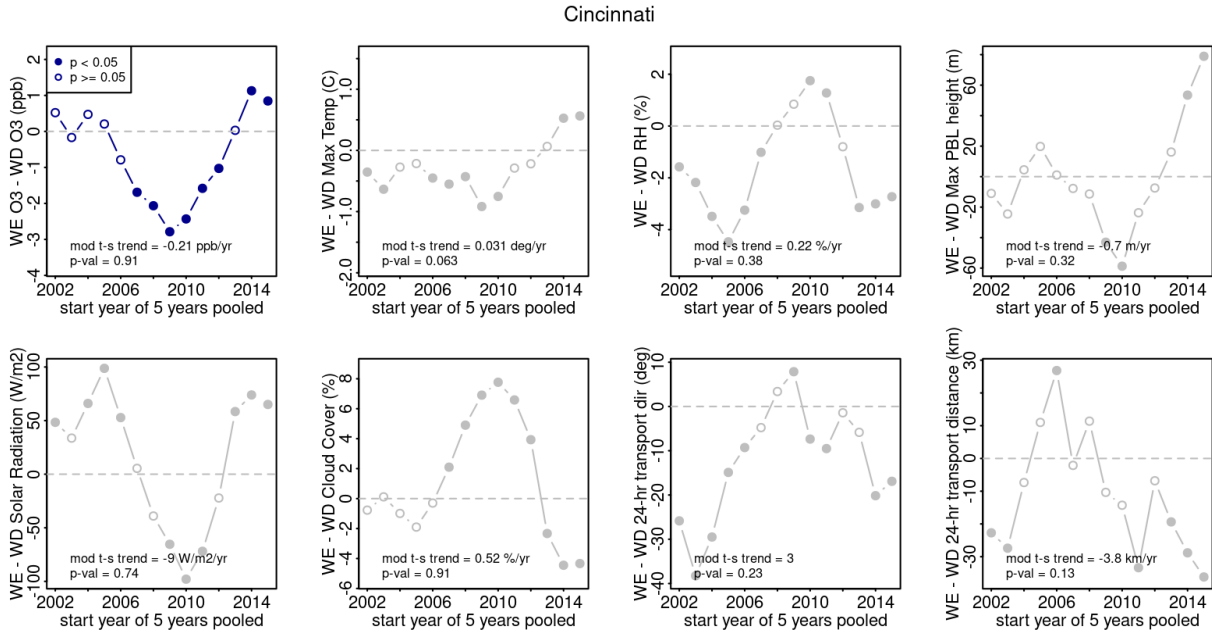

Figure S-12. Cincinnati  $\Delta O_{3,DOW}$  shown in blue and WE-WD patterns in seven meteorological variables shown in gray (daily maximum temperature, daily average relative humidity, maximum planetary boundary layer height, solar radiation, cloud cover percentage, 24-hr transport direction, 24-hour transport distance).

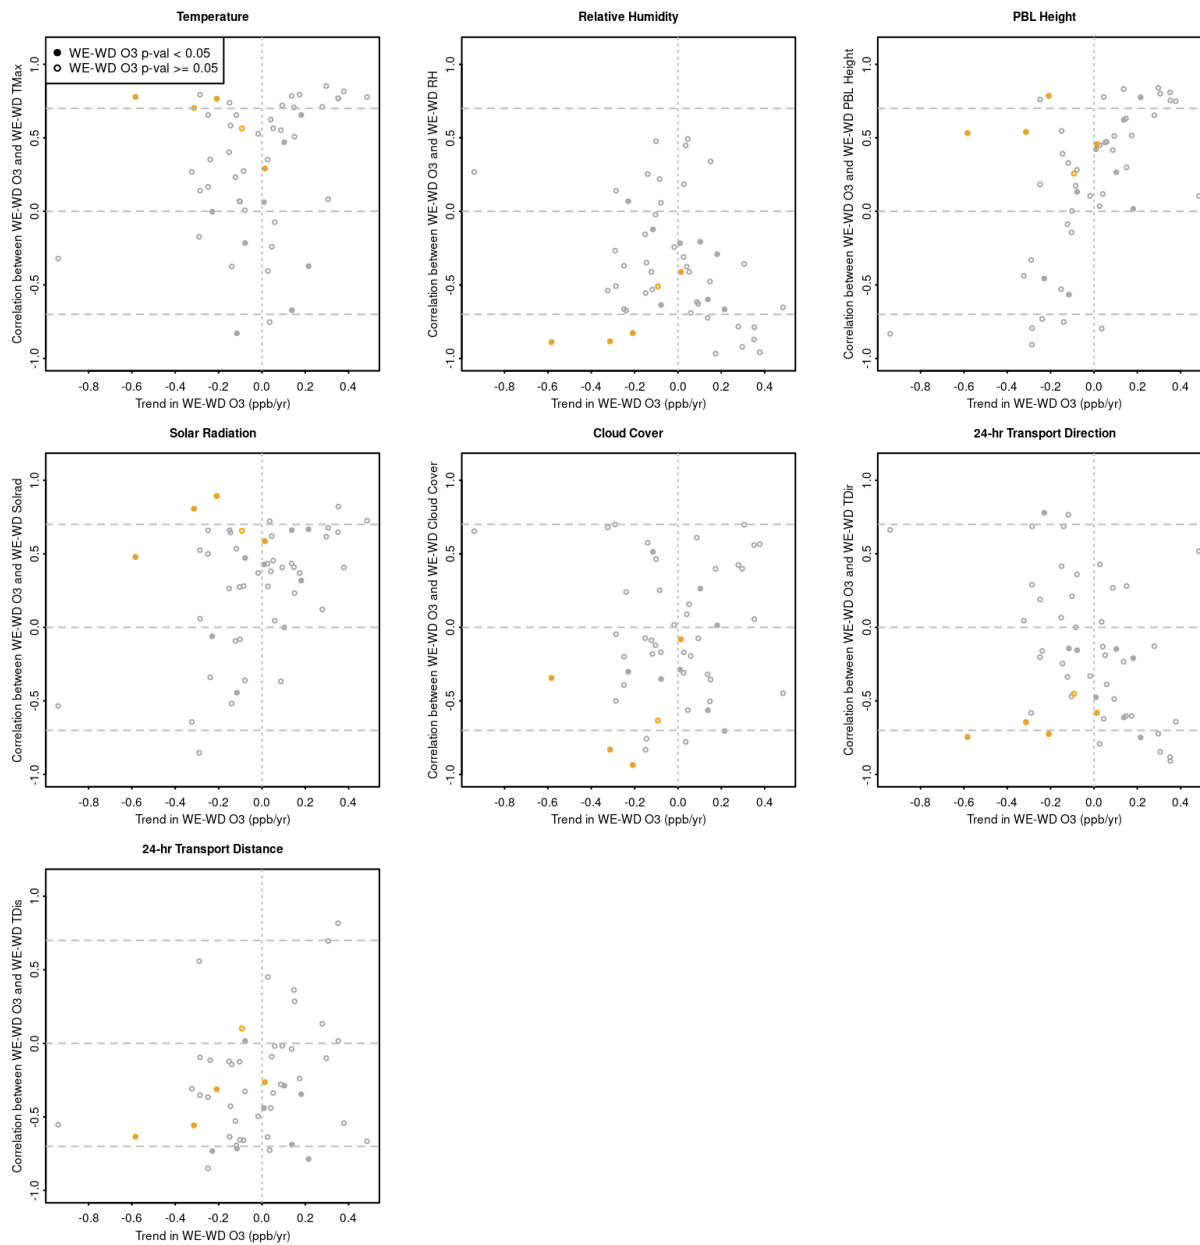

**S-13. Nonattainment areas plotted by correlation coefficient between  $\overline{\Delta O_{3,DOW}}$  and WE-WD differences in daily meteorology variables (y-axis) and trends in WE-WD mean ozone differences. Cincinnati, Louisville, Columbus, St. Louis, and Atlanta nonattainment areas shown in orange. All other nonattainment areas shown in gray. Solid circles indicate areas with statistically significant  $\overline{\Delta O_{3,DOW}}$  trends and open circles indicate areas with non-significant trends. Top and bottom dashed lines show correlation coefficients of  $\pm 0.7$  ( $r^2 = 0.49$ ) such that points falling above and below these lines indicate areas for which the variation in WE-WD meteorology differences could explain 49% or more of the variations in WE-WD ozone differences.**

Extra figures showing CMAQ MDA8 O<sub>3</sub> Normalized Mean Bias by season, region, and year

AQS\_Daily\_O3 O<sub>3</sub>\_8hrmax for March to May 2002

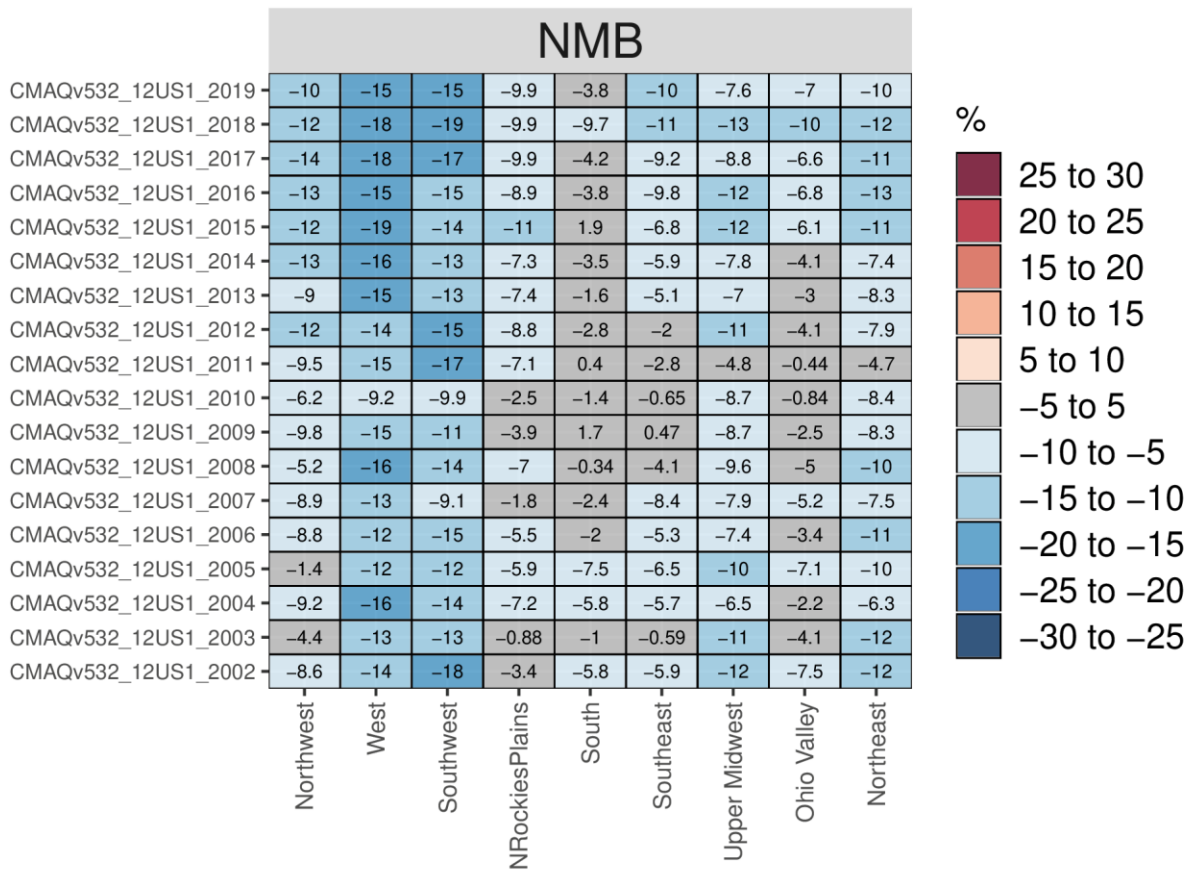

Figure S-14. EQUATES Mar-May MDA8 O<sub>3</sub> Normalized Mean Bias (%) by year and NOAA climate region.

### AQS\_Daily\_O3 O3\_8hrmax for June to August 2002

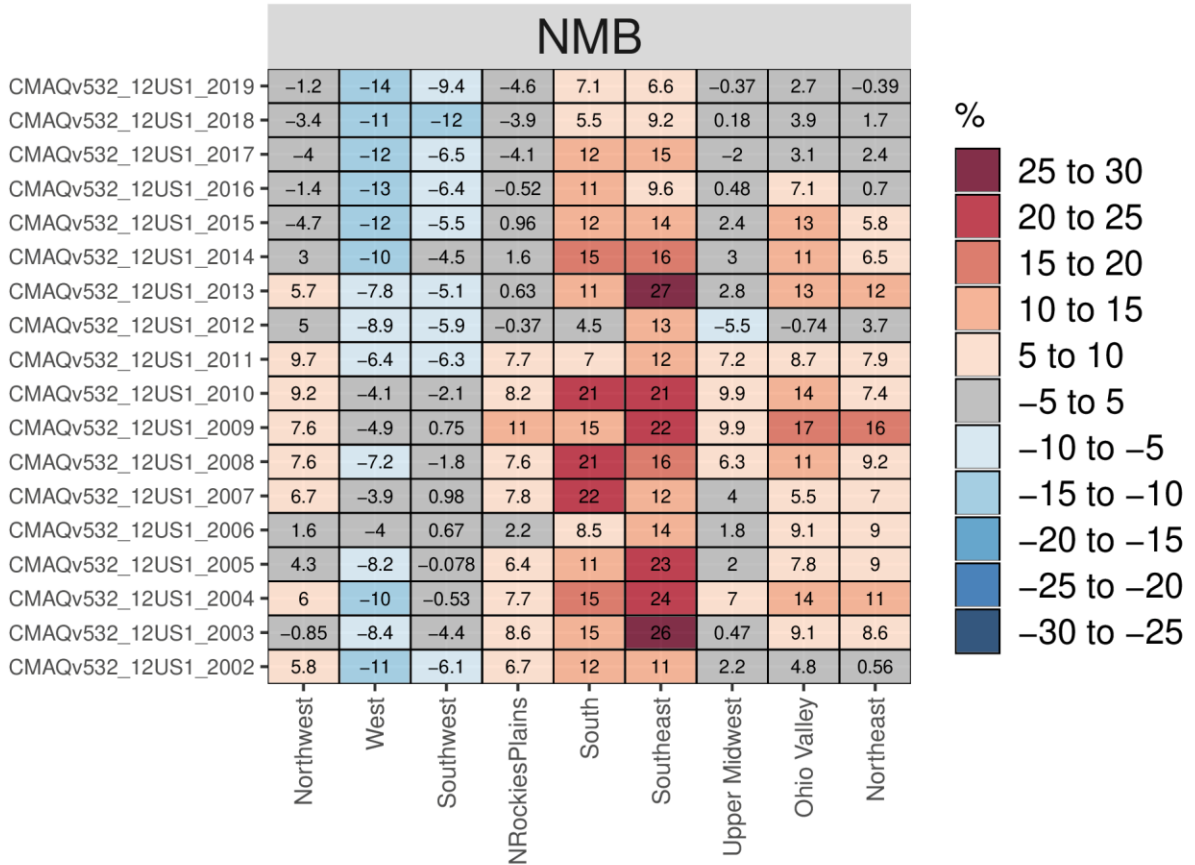

Figure S-15. EQUATES Jun-Aug MDA8 O<sub>3</sub> Normalized Mean Bias (%) by year and NOAA climate region.

#### Tables of results for each nonattainment area included in this analysis

Table S-1. Mean WE-WD MDA8 O<sub>3</sub> difference ( $\Delta\overline{O_{3,DOW}}$ ) and trends in each US nonattainment area

| region        | Nonattainment area                                 | Observed trends<br>(95% CI)<br>p-val   | Modeled trends<br>(95% CI)<br>p-val    | Observed $\Delta\overline{O_{3,DOW}}$ |           | Modeled $\Delta\overline{O_{3,DOW}}$ |           |
|---------------|----------------------------------------------------|----------------------------------------|----------------------------------------|---------------------------------------|-----------|--------------------------------------|-----------|
|               |                                                    |                                        |                                        | 2002-2006                             | 2015-2019 | 2002-2006                            | 2015-2019 |
| Northeast     | Greater Connecticut, CT                            | 0.179 (0.052,0.197)<br>p-val = 0.101   | -0.155 (-0.175,-0.034) p-val = 0.08    | -2.44                                 | -3.11     | 0.54                                 | -1.71     |
|               | Washington, DC-MD-VA                               | -0.016 (-0.109,0.12)<br>p-val = 0.743  | 0.029 (-0.035,0.066)<br>p-val = 0.381  | -2.18                                 | -2.34     | -2.36                                | -1.12     |
|               | Baltimore, MD                                      | 0.129 (0.073,0.159)<br>p-val = 0.006   | 0.085 (0.023,0.134)<br>p-val = 0.125   | -3.00                                 | -2.79     | -2.59                                | -1.29     |
|               | New York-Northern New Jersey-Long Island, NY-NJ-CT | 0.04 (-0.029,0.079)<br>p-val = 1       | -0.15 (-0.16,-0.057)<br>p-val = 0.021  | -0.58                                 | -1.95     | 1.31                                 | -0.46     |
|               | Philadelphia-Wilmington-Atlantic City, PA-NJ-MD-DE | 0.185 (0.128,0.225)<br>p-val = 0.001   | -0.009 (-0.067,0.064)<br>p-val = 0.743 | -2.35                                 | -2.02     | -1.64                                | -1.01     |
| Upper Midwest | Allegan County, MI                                 | 0.066 (-0.089,0.191)<br>p-val = 0.743  | -0.178 (-0.292,-0.143) p-val = 0.006   | 2.59                                  | -2.89     | 3.67                                 | -2.00     |
|               | Berrien County, MI                                 | -0.007 (-0.162,0.084)<br>p-val = 0.381 | -0.156 (-0.232,-0.091) p-val = 0.004   | 2.27                                  | -3.35     | 3.11                                 | -1.79     |

|                     |                                                              |                                          |                                          |       |       |       |       |
|---------------------|--------------------------------------------------------------|------------------------------------------|------------------------------------------|-------|-------|-------|-------|
|                     | Detroit, MI                                                  | 0.137 (-0.072,0.252)<br>p-val = 0.913    | -0.257 (-0.339,-<br>0.125) p-val = 0.006 | 3.81  | -1.48 | 5.64  | -1.41 |
|                     | Muskegon County, MI                                          | 0.123 (-0.092,0.212)<br>p-val = 1        | -0.17 (-0.29,-0.092)<br>p-val = 0.009    | 3.67  | -2.11 | 5.31  | -1.32 |
|                     | Door County, WI                                              | 0.071 (-0.116,0.214)<br>p-val = 0.913    | -0.017 (-0.271,0.047)<br>p-val = 0.228   | 4.57  | -0.67 | 8.31  | 1.41  |
|                     | Manitowoc County, WI                                         | -0.099 (-0.253,-<br>0.017) p-val = 0.08  | -0.387 (-0.597,-<br>0.233) p-val = 0.002 | 5.73  | -0.56 | 8.96  | 0.69  |
|                     | Milwaukee, WI                                                | -0.302 (-0.435,-<br>0.212) p-val = 0.001 | -0.416 (-0.486,-<br>0.345) p-val < 0.001 | 6.08  | -0.90 | 6.84  | 0.20  |
|                     | Sheboygan County, WI                                         | 0.016 (-0.205,0.105)<br>p-val = 0.443    | -0.179 (-0.325,-<br>0.099) p-val = 0.004 | 6.71  | -0.65 | 5.38  | -0.52 |
| Ohio Valley         | Chicago, IL-IN-WI                                            | -0.112 (-0.239,-<br>0.029) p-val = 0.101 | -0.341 (-0.446,-<br>0.284) p-val < 0.001 | 4.69  | -1.39 | 6.45  | -1.16 |
|                     | Louisville, KY-IN                                            | -0.31 (-0.469,-0.118)<br>p-val = 0.189   | -0.349 (-0.444,-<br>0.051) p-val = 0.125 | 0.45  | -0.44 | 1.03  | -0.92 |
|                     | St. Louis, MO-IL                                             | -0.633 (-0.811,0.02)<br>p-val = 0.274    | -0.18 (-0.296,-0.075)<br>p-val = 0.049   | 2.13  | -1.68 | 2.18  | -0.49 |
|                     | Cleveland, OH                                                | 0.077 (-0.064,0.126)<br>p-val = 0.511    | 0 (-0.117,0.044) p-<br>val = 0.324       | 2.09  | -1.44 | 2.81  | -0.71 |
|                     | Columbus, OH                                                 | -0.068 (-0.132,0.018)<br>p-val = 0.443   | 0.085 (0.027,0.132)<br>p-val = 0.274     | 0.89  | -0.32 | 0.99  | -0.44 |
|                     | Cincinnati, OH-KY                                            | -0.218 (-0.283,0.057)<br>p-val = 0.913   | -0.163 (-0.288,-<br>0.015) p-val = 0.189 | 0.60  | 0.84  | 1.83  | -0.80 |
| South and Southeast | Atlanta, GA                                                  | 0.047 (-0.063,0.149)<br>p-val = 0.274    | -0.186 (-0.261,-<br>0.063) p-val = 0.155 | -5.06 | -2.74 | -3.02 | -3.66 |
|                     | Dallas-Fort Worth, TX                                        | -0.086 (-0.116,-<br>0.015) p-val = 0.155 | -0.142 (-0.207,-<br>0.092) p-val = 0.001 | -1.64 | -2.48 | 0.91  | -1.28 |
|                     | Houston-Galveston-Brazoria, TX                               | -0.262 (-0.316,-<br>0.213) p-val = 0.016 | -0.348 (-0.412,-<br>0.288) p-val = 0.001 | 0.75  | -1.50 | 2.77  | -0.30 |
|                     | San Antonio, TX                                              | -0.155 (-0.196,-<br>0.116) p-val = 0.101 | -0.159 (-0.186,-<br>0.121) p-val = 0.001 | -1.60 | -1.87 | 0.09  | -1.82 |
| Southwest           | Phoenix-Mesa, AZ                                             | -0.147 (-0.173,-0.1)<br>p-val < 0.001    | -0.223 (-0.358,-<br>0.152) p-val < 0.001 | 0.80  | -1.81 | 1.76  | -1.87 |
|                     | Yuma, AZ                                                     | 0.025 (-0.059,0.06)<br>p-val = 1         | 0.006 (-0.073,0.028)<br>p-val = 0.902    | NA    | -1.00 | NA    | -0.84 |
|                     | Denver Metro/North Front Range, CO                           | -0.226 (-0.306,-<br>0.173) p-val < 0.001 | -0.286 (-0.297,-<br>0.268) p-val < 0.001 | 3.59  | -1.22 | 2.96  | -0.51 |
|                     | Dona Ana County (Sunland Park), NM                           | 0.128 (0.083,0.152)<br>p-val = 0.029     | 0.138 (0.079,0.196)<br>p-val = 0.08      | 0.19  | 1.48  | -0.53 | 0.26  |
|                     | Northern Wasatch Front, UT                                   | -0.158 (-0.185,-<br>0.145) p-val < 0.001 | -0.131 (-0.173,-<br>0.125) p-val < 0.001 | 2.48  | -0.12 | 2.87  | 0.21  |
|                     | Southern Wasatch Front, UT                                   | -0.154 (-0.189,-<br>0.131) p-val < 0.001 | -0.187 (-0.202,-<br>0.145) p-val < 0.001 | 2.45  | -0.44 | 2.40  | 0.05  |
|                     | Uinta Basin, UT                                              | 0.067 (0.005,0.104)<br>p-val = 0.466     | -0.008 (-0.029,0.021)<br>p-val = 0.348   | NA    | -0.50 | NA    | -0.76 |
| West                | Amador County, CA                                            | 0.354 (0.214,0.415)<br>p-val = 0.003     | 0.286 (0.24,0.319)<br>p-val < 0.001      | -4.48 | -2.13 | -5.00 | -2.66 |
|                     | Butte County, CA                                             | 0.145 (0.097,0.165)<br>p-val = 0.004     | 0.134 (0.122,0.152)<br>p-val = 0.001     | -3.24 | -2.74 | -4.68 | -3.29 |
|                     | Calaveras County, CA                                         | 0.302 (0.217,0.337)<br>p-val < 0.001     | 0.256 (0.206,0.283)<br>p-val < 0.001     | -5.69 | -2.31 | -4.27 | -2.44 |
|                     | Imperial County, CA                                          | -0.167 (-0.224,-<br>0.124) p-val < 0.001 | -0.054 (-0.089,0) p-<br>val = 0.274      | 0.33  | -3.06 | -0.94 | -2.81 |
|                     | Kern County (Eastern Kern), CA                               | 0.059 (0.037,0.072)<br>p-val = 0.003     | 0.176 (0.127,0.216)<br>p-val = 0.001     | -3.20 | -2.76 | -3.16 | -2.24 |
|                     | Los Angeles-San Bernardino Counties (West Mojave Desert), CA | -0.284 (-0.341,-<br>0.276) p-val < 0.001 | -0.36 (-0.422,-0.322)<br>p-val < 0.001   | 1.62  | -3.26 | 3.02  | -3.14 |
|                     | Los Angeles-South Coast Air Basin, CA                        | -0.928 (-0.976,-<br>0.856) p-val < 0.001 | -0.83 (-1.005,-0.775)<br>p-val < 0.001   | 13.07 | 0.41  | 15.23 | 2.07  |
|                     | Mariposa County, CA                                          | 0.185 (0.152,0.227)<br>p-val = 0.001     | 0.221 (0.198,0.25)<br>p-val < 0.001      | -3.85 | -0.50 | -3.55 | -0.38 |
|                     | Morongo Band of Mission Indians, CA                          | -0.127 (-0.374,-0.04)<br>p-val = 0.107   | -0.396 (-0.433,-<br>0.302) p-val < 0.001 | NA    | -4.57 | NA    | -4.64 |
|                     | Nevada County (Western part), CA                             | 0.31 (0.254,0.352)<br>p-val < 0.001      | 0.249 (0.21,0.256)<br>p-val < 0.001      | -5.02 | -1.91 | -5.17 | -2.53 |

|  |                                              |                                         |                                         |       |       |       |       |
|--|----------------------------------------------|-----------------------------------------|-----------------------------------------|-------|-------|-------|-------|
|  | Pechanga Band of Luiseno Mission Indians, CA | -0.251 (-0.315,0.215)<br>p-val = 0.902  | -0.136 (-0.387,0.088)<br>p-val = 0.266  | NA    | NA    | NA    | NA    |
|  | Riverside County (Coachella Valley), CA      | -0.247 (-0.384,-0.218)<br>p-val < 0.001 | 0.018 (-0.122,0.041)<br>p-val = 0.913   | 2.31  | -3.53 | -0.35 | -3.00 |
|  | Sacramento Metro, CA                         | 0.082 (-0.06,0.124)<br>p-val = 0.743    | -0.038 (-0.056,-0.013)<br>p-val = 0.08  | -1.56 | -2.43 | -1.75 | -2.43 |
|  | San Diego County, CA                         | -0.361 (-0.407,-0.324)<br>p-val < 0.001 | -0.44 (-0.503,-0.356)<br>p-val < 0.001  | 5.27  | -0.32 | 9.39  | 1.84  |
|  | San Francisco Bay Area, CA                   | -0.067 (-0.172,-0.05)<br>p-val = 0.016  | -0.08 (-0.103,-0.029)<br>p-val = 0.063  | 3.85  | 1.05  | 2.69  | 1.21  |
|  | San Joaquin Valley, CA                       | 0.185 (0.037,0.241)<br>p-val = 0.189    | 0.102 (0.029,0.143)<br>p-val = 0.381    | -2.26 | -1.81 | -1.44 | -2.10 |
|  | San Luis Obispo (Eastern part), CA           | 0.433 (0.363,0.483)<br>p-val = 0.001    | 0.327 (0.228,0.367)<br>p-val < 0.001    | NA    | -0.79 | NA    | -0.44 |
|  | Sutter Buttes, CA                            | 0.261 (0.157,0.312)<br>p-val = 0.009    | 0.109 (0.076,0.153)<br>p-val = 0.009    | -3.13 | -2.81 | -4.02 | -2.91 |
|  | Tuolumne County, CA                          | 0.356 (0.269,0.394)<br>p-val < 0.001    | 0.353 (0.319,0.381)<br>p-val < 0.001    | -4.07 | -0.96 | -5.14 | -1.53 |
|  | Tuscan Buttes, CA                            | 0.14 (0.051,0.164)<br>p-val = 0.063     | 0.14 (0.067,0.23)<br>p-val = 0.016      | -2.47 | -2.68 | -4.88 | -2.56 |
|  | Ventura County, CA                           | -0.137 (-0.19,-0.119)<br>p-val < 0.001  | 0.008 (-0.035,0.083)<br>p-val = 1       | 0.71  | -1.62 | 0.28  | -0.81 |
|  | Las Vegas, NV                                | -0.284 (-0.456,-0.222)<br>p-val < 0.001 | -0.106 (-0.138,-0.076)<br>p-val = 0.001 | 4.44  | -1.21 | 1.58  | -0.95 |

**Table S-2. WE-WD differences percent of days with MDA8 ozone exceeding 70 ppb ( $\Delta O_{3,DOW,\%>70}$ ) and trends in each US nonattainment area**

| region        | Nonattainment area                                 | Observed trends<br>(95% CI)             | Modeled trends<br>(95% CI)              | Observed<br>$\Delta O_{3,DOW,\%>70}$ |           | Modeled<br>$\Delta O_{3,DOW,\%>70}$ |           |
|---------------|----------------------------------------------------|-----------------------------------------|-----------------------------------------|--------------------------------------|-----------|-------------------------------------|-----------|
|               |                                                    |                                         |                                         | 2002-2006                            | 2015-2019 | 2002-2006                           | 2015-2019 |
| Northeast     | Greater Connecticut, CT                            | 0.009 (-0.172,0.203)<br>p-val = 1       | -0.373 (-0.442,-0.236)<br>p-val = 0.029 | -5.13                                | -6.39     | 5.27                                | 0.63      |
|               | Washington, DC-MD-VA                               | 1.14 (0.637,1.303)<br>p-val = 0.004     | 1.119 (0.945,1.242)<br>p-val < 0.001    | -12.12                               | -10.36    | -13.01                              | -3.64     |
|               | Baltimore, MD                                      | 0.615 (0.442,0.922)<br>p-val = 0.004    | 1.505 (1.351,1.683)<br>p-val < 0.001    | -11.83                               | -10.36    | -16.69                              | -0.59     |
|               | New York-Northern New Jersey-Long Island, NY-NJ-CT | 0.562 (0.4,0.764)<br>p-val = 0.08       | 0.212 (-0.058,0.749)<br>p-val = 0.274   | -5.40                                | -6.96     | -3.57                               | -1.17     |
|               | Philadelphia-Wilmington-Atlantic City, PA-NJ-MD-DE | 1.018 (0.535,1.237)<br>p-val = 0.004    | 0.796 (0.525,1.058)<br>p-val = 0.009    | -9.06                                | -6.98     | -8.75                               | 2.77      |
| Upper Midwest | Allegan County, MI                                 | 0.797 (0.5,0.97)<br>p-val = 0.012       | -0.044 (-0.076,0.068)<br>p-val = 0.351  | 0.15                                 | 0.63      | 3.47                                | 0.00      |
|               | Berrien County, MI                                 | 0.644 (0.397,0.701)<br>p-val = 0.016    | -0.233 (-0.441,-0.066)<br>p-val = 0.063 | 0.48                                 | 0.28      | 2.98                                | -0.62     |
|               | Detroit, MI                                        | 0.642 (0.28,0.774)<br>p-val = 0.155     | -0.061 (-0.419,0.259)<br>p-val = 0.411  | 5.20                                 | 0.94      | 9.79                                | -1.83     |
|               | Muskegon County, MI                                | 0.081 (-0.235,0.291)<br>p-val = 1       | -0.652 (-0.858,-0.519)<br>p-val = 0.001 | 7.27                                 | 3.43      | 7.90                                | 1.26      |
|               | Door County, WI                                    | 0.014 (-0.072,0.153)<br>p-val = 1       | -0.461 (-0.609,-0.328)<br>p-val = 0.001 | 4.15                                 | 0.68      | 16.10                               | 1.61      |
|               | Manitowoc County, WI                               | -0.203 (-0.431,-0.107)<br>p-val = 0.037 | -0.232 (-0.288,-0.094)<br>p-val = 0.037 | 7.67                                 | 1.28      | 12.74                               | 1.28      |
|               | Milwaukee, WI                                      | 0.04 (-0.233,0.197)<br>p-val = 0.661    | -0.205 (-0.348,-0.018)<br>p-val = 0.125 | 7.68                                 | 0.32      | 9.81                                | 1.23      |
|               | Sheboygan County, WI                               | 0.114 (-0.177,0.251)<br>p-val = 0.913   | -0.146 (-0.401,-0.034)<br>p-val = 0.101 | 9.21                                 | 1.02      | 4.90                                | -0.31     |
| Ohio Valley   | Chicago, IL-IN-WI                                  | 0.466 (0.038,0.747)<br>p-val = 0.443    | -0.153 (-0.443,0.066)<br>p-val = 0.189  | 3.12                                 | -3.94     | 7.38                                | -2.12     |
|               | Louisville, KY-IN                                  | 0.198 (-0.65,0.621)<br>p-val = 0.324    | -0.104 (-0.551,0.031)<br>p-val = 0.124  | 2.52                                 | -2.74     | 6.82                                | -1.82     |
|               | St. Louis, MO-IL                                   | -0.61 (-1.416,0.066)<br>p-val = 0.155   | 0.105 (-0.189,0.299)<br>p-val = 0.913   | 3.15                                 | -7.92     | 3.74                                | -1.52     |
|               | Cleveland, OH                                      | 0.687 (0.325,0.951)<br>p-val = 0.063    | 0.7 (0.497,0.797)<br>p-val = 0.002      | 4.67                                 | 0.02      | 0.39                                | 4.90      |

|                     |                                                              |                                                |                                         |        |        |        |        |
|---------------------|--------------------------------------------------------------|------------------------------------------------|-----------------------------------------|--------|--------|--------|--------|
|                     | Columbus, OH                                                 | 0.006 (-0.157,0.215)<br>p-val = 0.956          | 0.544 (0.508,0.668) p-<br>val = 0.002   | 3.44   | -2.74  | -1.47  | 0.92   |
|                     | Cincinnati, OH-KY                                            | 0.074 (-0.207,0.216)<br>p-val = 0.913          | -0.013 (-0.154,0.107)<br>p-val = 0.913  | 1.92   | -4.86  | 1.01   | -2.43  |
| South and Southeast | Atlanta, GA                                                  | -0.411 (-0.53,0.14) p-<br>val = 0.743          | -1.689 (-1.992,-0.564)<br>p-val = 0.08  | -8.76  | -6.76  | -3.22  | -11.38 |
|                     | Dallas-Fort Worth, TX                                        | -1.025 (-1.235,-0.302)<br>p-val = 0.08         | -1.396 (-1.497,-0.61)<br>p-val = 0.009  | -5.38  | -10.34 | 7.14   | -3.95  |
|                     | Houston-Galveston-Brazoria, TX                               | -1.222 (-1.613,-0.719)<br>p-val = 0.006        | -0.505 (-0.904,-0.146)<br>p-val = 0.101 | 2.63   | -8.82  | 3.08   | -1.21  |
|                     | San Antonio, TX                                              | 0.402 (0.241,0.545) p-<br>val = 0.009          | 0.307 (0.134,0.346) p-<br>val = 0.014   | -8.81  | -0.88  | -1.80  | 0.01   |
| Southwest           | Phoenix-Mesa, AZ                                             | -0.227 (-0.308,-0.011)<br>p-val = 0.155        | -0.334 (-0.49,-0.115)<br>p-val = 0.08   | -9.65  | -10.92 | 1.31   | -2.44  |
|                     | Yuma, AZ                                                     | 1.554 (1.246,1.593) p-<br>val = 0.002          | 0.108 (0.098,0.133) p-<br>val = 0.003   | NA     | 1.86   | NA     | 0.00   |
|                     | Denver Metro/North Front Range, CO                           | -0.926 (-1.066,-0.755)<br>p-val < 0.001        | -0.427 (-0.561,-0.37)<br>p-val = 0.002  | 0.41   | -10.62 | 3.44   | -3.34  |
|                     | Dona Ana County (Sunland Park), NM                           | -0.187 (-0.229,-0.062)<br>p-val = 0.032        | 0.304 (0.183,0.377) p-<br>val = 0.005   | 0.96   | -0.89  | -0.59  | 0.00   |
|                     | Northern Wasatch Front, UT                                   | -0.825 (-1.034,-0.685)<br>p-val < 0.001        | 0.072 (-0.136,0.147)<br>p-val = 1       | 7.71   | -6.06  | 2.46   | -0.61  |
|                     | Southern Wasatch Front, UT                                   | -0.207 (-0.365,0.077)<br>p-val = 0.443         | -0.161 (-0.202,-0.006)<br>p-val = 0.048 | 0.34   | -4.56  | 0.93   | -0.61  |
|                     | Uinta Basin, UT                                              | 0.047 (0.035,0.094) p-<br>val = 0.02           | 0.091 (-0.04,0.136) p-<br>val = 0.529   | NA     | -0.91  | NA     | -0.30  |
| West                | Amador County, CA                                            | 0.768 (0.583,1.27) p-<br>val = 0.016           | 0.925 (0.732,0.959) p-<br>val < 0.001   | -8.01  | -3.18  | -10.14 | -0.96  |
|                     | Butte County, CA                                             | 0.923 (0.79,1.013) p-<br>val = 0.001           | 1.132 (0.903,1.193) p-<br>val < 0.001   | -14.88 | -5.54  | -13.40 | -3.07  |
|                     | Calaveras County, CA                                         | 0.972 (0.633,1.251) p-<br>val = 0.029          | 0.653 (0.524,0.729) p-<br>val < 0.001   | -17.60 | -11.20 | -8.74  | -1.56  |
|                     | Imperial County, CA                                          | -0.364 (-0.5,-0.276) p-<br>val = 0.012         | 0.438 (0.267,0.463) p-<br>val = 0.001   | -3.89  | -10.66 | -2.73  | -0.61  |
|                     | Kern County (Eastern Kern), CA                               | 0.288 (-0.234,0.454)<br>p-val = 0.443          | 0.969 (0.915,1.138) p-<br>val < 0.001   | -5.35  | -6.62  | -11.35 | -0.94  |
|                     | Los Angeles-San Bernardino Counties (West Mojave Desert), CA | -1.251 (-1.336,-1.023)<br>p-val < 0.001        | -0.79 (-2.023,-0.33) p-<br>val = 0.016  | 0.85   | -16.63 | 16.03  | -9.12  |
|                     | Los Angeles-South Coast Air Basin, CA                        | -0.743 (-1.033,-0.54)<br>p-val = 0.001         | -0.457 (-2.067,0.043)<br>p-val = 0.08   | 10.34  | -4.06  | 24.90  | 0.11   |
|                     | Mariposa County, CA                                          | 1.536 (1.207,1.713) p-<br>val p-val < 0.001    | 0.025 (-0.031,0.093)<br>p-val = 0.615   | -18.96 | -2.10  | -1.83  | -1.21  |
|                     | Morongo Band of Mission Indians, CA                          | -1.007 (-1.216,-0.591)<br>p-val = 0.007        | -1.605 (-1.916,-1.258)<br>p-val = 0.005 | NA     | -12.00 | NA     | -9.03  |
|                     | Nevada County (Western part), CA                             | 0.621 (0.373,0.731) p-<br>val = 0.002          | 0.778 (0.654,0.874) p-<br>val < 0.001   | -14.21 | -7.89  | -12.18 | -2.17  |
|                     | Pechanga Band of Luiseno Mission Indians, CA                 | 1.003 (0.291,1.176) p-<br>val = 0.108          | 0.116 (-0.198,0.403)<br>p-val = 0.902   | NA     | 0.00   | NA     | -0.82  |
|                     | Riverside County (Coachella Valley), CA                      | -1.846 (-2.041,-1.68)<br>p-val = p-val < 0.001 | 0.663 (-0.152,0.754)<br>p-val = 0.274   | 6.89   | -14.86 | -0.23  | -3.05  |
|                     | Sacramento Metro, CA                                         | 0.033 (-0.524,0.337)<br>p-val = 1              | 0.167 (0.009,0.259) p-<br>val = 0.063   | -8.39  | -13.67 | -10.31 | -6.09  |
|                     | San Diego County, CA                                         | -1.213 (-1.922,-0.665)<br>p-val = 0.009        | -2.214 (-2.521,-2.075)<br>p-val < 0.001 | 20.26  | -10.95 | 24.82  | -3.96  |
|                     | San Francisco Bay Area, CA                                   | -0.317 (-0.626,-0.138)<br>p-val = 0.049        | 0.02 (-0.463,0.149) p-<br>val = 0.956   | 5.53   | -2.43  | 6.74   | 1.23   |
|                     | San Joaquin Valley, CA                                       | -0.34 (-0.436,-0.144)<br>p-val = 0.155         | 1.052 (0.458,1.288) p-<br>val = 0.018   | -5.85  | -5.31  | -9.94  | -5.16  |
|                     | San Luis Obispo (Eastern part), CA                           | 0.936 (0.539,1.474) p-<br>val = 0.02           | 0.006 (-0.024,0.199)<br>p-val = 0.105   | NA     | -2.13  | NA     | -0.61  |
|                     | Sutter Buttes, CA                                            | 0.633 (0.214,0.701) p-<br>val = 0.189          | 0.095 (0.068,0.197) p-<br>val = 0.025   | -4.95  | -5.73  | -0.93  | -0.40  |
|                     | Tuolumne County, CA                                          | 1.22 (1.046,1.374) p-<br>val = p-val < 0.001   | 0.292 (0.23,0.46) p-<br>val = 0.005     | -12.43 | -0.62  | -2.79  | -0.31  |
|                     | Tuscan Buttes, CA                                            | 0.466 (0.287,0.592) p-<br>val = 0.063          | 0.745 (0.725,0.829) p-<br>val < 0.001   | -5.81  | -6.84  | -9.48  | -1.36  |

|  |                    |                                                 |                                        |       |        |       |       |
|--|--------------------|-------------------------------------------------|----------------------------------------|-------|--------|-------|-------|
|  | Ventura County, CA | -1.067 (-1.358,-0.94)<br>p-val = p-val < 0.001  | 0.554 (0.388,0.661) p-<br>val < 0.001  | 12.05 | -6.09  | -3.29 | -0.61 |
|  | Las Vegas, NV      | -1.931 (-2.467,-1.462)<br>p-val = p-val < 0.001 | -0.213 (-0.293,-0.03)<br>p-val = 0.443 | 17.82 | -10.34 | 0.66  | -3.96 |
